# Supplementary material for: Evaluation of the Hamburg-Glasgow Classification in Pancreatic Cancer: Preoperative Staging by Combining Disseminated Tumor Load and Systemic Inflammation
Source: MDPI journal article supplement (doi:10.3390/cancers13235942), 2021-11-25
Supplement: s1 [file s1]

# Supplementary Materials: Evaluation of the Hamburg-Glasgow Classification in Pancreatic Cancer: Preoperative Staging by Combining Disseminated Tumor Load and Systemic Inflammation

Thaer S. A. Abdalla, Valeria Almanfalouti, Katharina Effenberger, Faik G. Uzunoglu, Tarik Ghadban, Anna Dupréé, Jakob R. Izbicki, Klaus Pantel and Matthias Reeh

## 1. Supplementary Figures

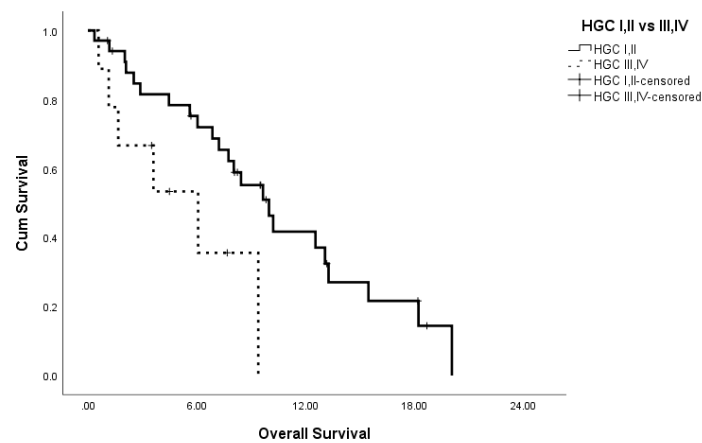

| Overall comparison    | Chi-Square | <i>p</i> |
|-----------------------|------------|----------|
| Log Rank (Mantel-Cox) | 4.720      | 0.030    |

Legend: *p*-value Indicates significance according to Log-Rank (Mantel-Cox).

**Figure S1.** Univariate Kaplan-Meier analysis for overall survival according to HGC in metastatic pancreatic cancer. Legend: *p*-value Indicates significance according to Log-Rank (Mantel-Cox).

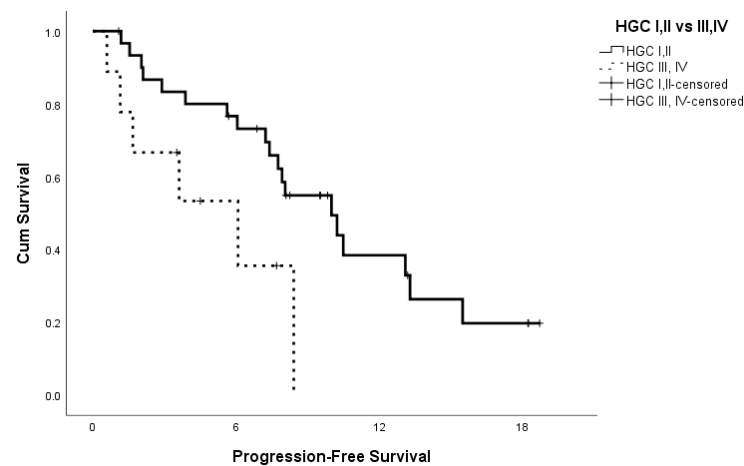

| Overall comparison    | Chi-Square | <i>p</i> |
|-----------------------|------------|----------|
| Log Rank (Mantel-Cox) | 5.051      | 0.025    |

Legend: *p*-value Indicates significance according to Log-Rank (Mantel-Cox).

**Figure S2.** Univariate Kaplan-Meier analysis for progression-free survival according to HGC in metastatic pancreatic cancer.

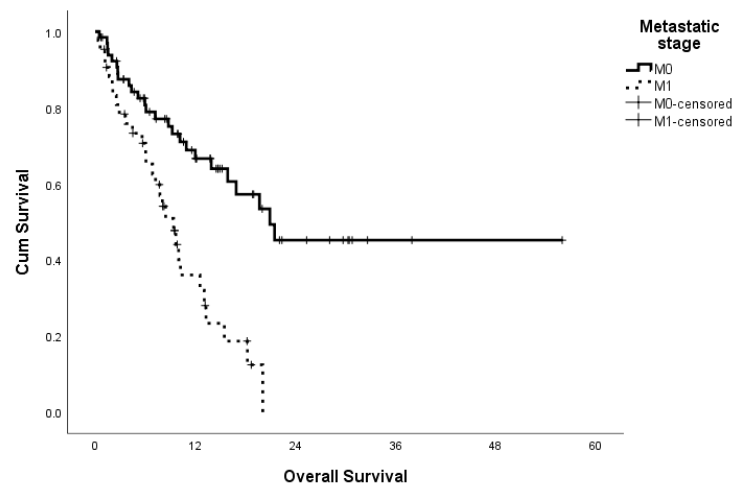

| Overall comparison    | Chi-Square | <i>p</i> |
|-----------------------|------------|----------|
| Log Rank (Mantel-Cox) | 15.735     | ≤0.001   |

Legend: *p*-value Indicates significance according to Log-Rank (Mantel-Cox).

**Figure S3.** Univariate Kaplan-Meier analysis for overall survival according to the metastatic status.

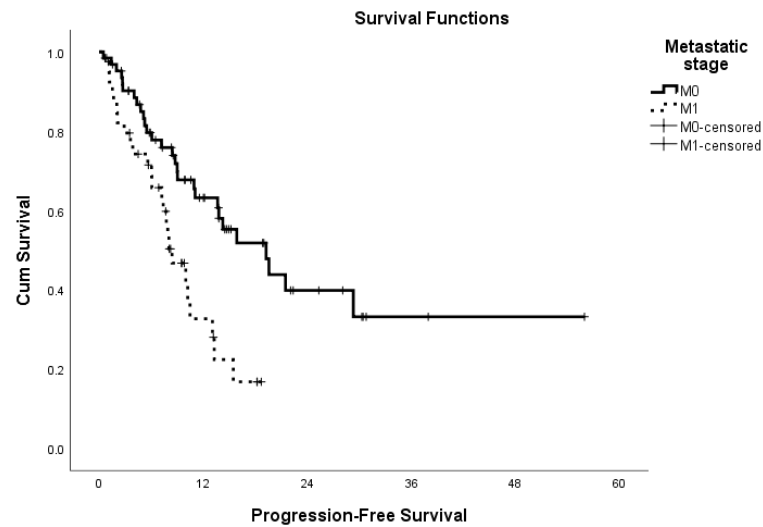

| Overall comparison    | Chi-Square | <i>p</i> |
|-----------------------|------------|----------|
| Log Rank (Mantel-Cox) | 9.579      | 0.002    |

Legend: *p*-value Indicates significance according to Log-Rank (Mantel-Cox).

**Figure S4.** Univariate Kaplan-Meier analysis for progression-free survival according to the metastatic status.

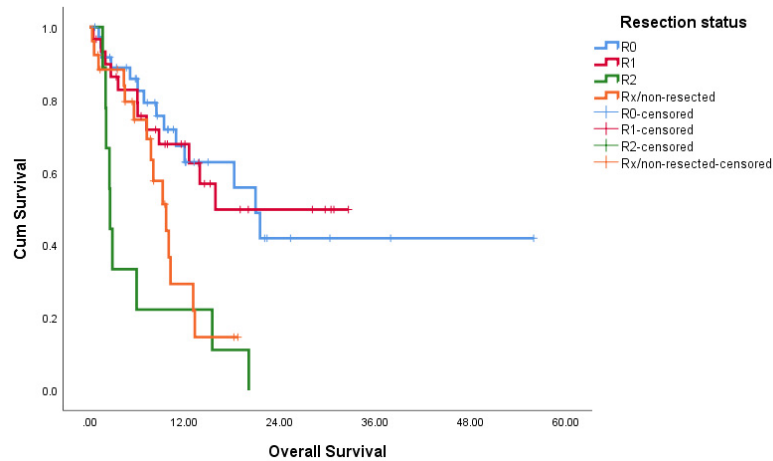

| Overall comparison    | Chi-Square | <i>p</i> |
|-----------------------|------------|----------|
| Log Rank (Mantel-Cox) | 20.506     | <0.001   |

| Pair-wise comparison | <i>p</i> |
|----------------------|----------|
| R2 vs R1             | 0.001    |
| R2 vs R0             | <0.001   |
| R2 vs Rx             | 0.190    |

Legend: *p*-value Indicates significance according to Log-Rank (Mantel-Cox).

**Figure S5.** Univariate Kaplan-Meier analysis for overall survival according to Resection status.

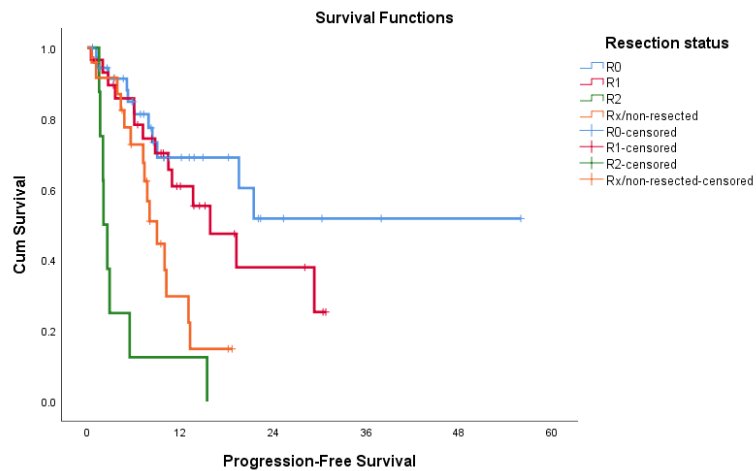

| Overall comparison    | Chi-Square | <i>p</i> |
|-----------------------|------------|----------|
| Log Rank (Mantel-Cox) | 32.320     | <0.001   |

| Pair-wise comparison | <i>p</i> |
|----------------------|----------|
| R2 vs R1             | <0.001   |
| R2 vs R0             | <0.001   |
| R2 vs Rx             | 0.03     |

Legend: *p*-value Indicates significance according to Log-Rank (Mantel-Cox).

**Figure S6.** Univariate Kaplan-Meier analysis for progression-free survival according to Resection.

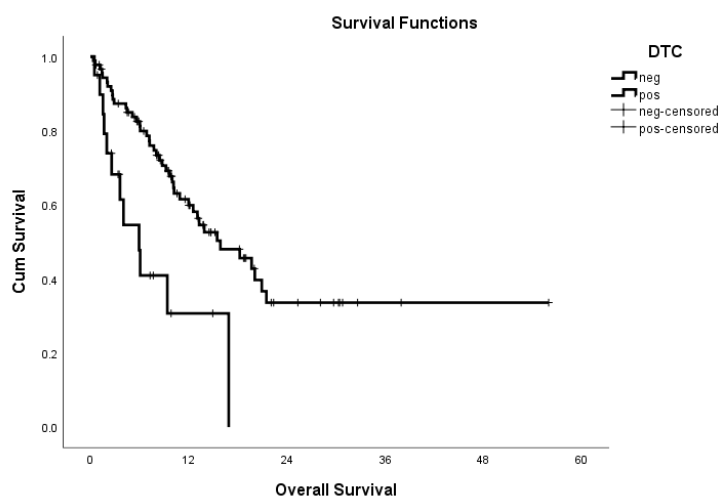

| Overall comparison    | Chi-Square | <i>p</i> |
|-----------------------|------------|----------|
| Log Rank (Mantel-Cox) | 10.585     | 0.001    |

Legend: *p*-value Indicates significance according to Log-Rank (Mantel-Cox).

**Figure S7.** Univariate Kaplan-Meier analysis for overall survival according to DTC detection.

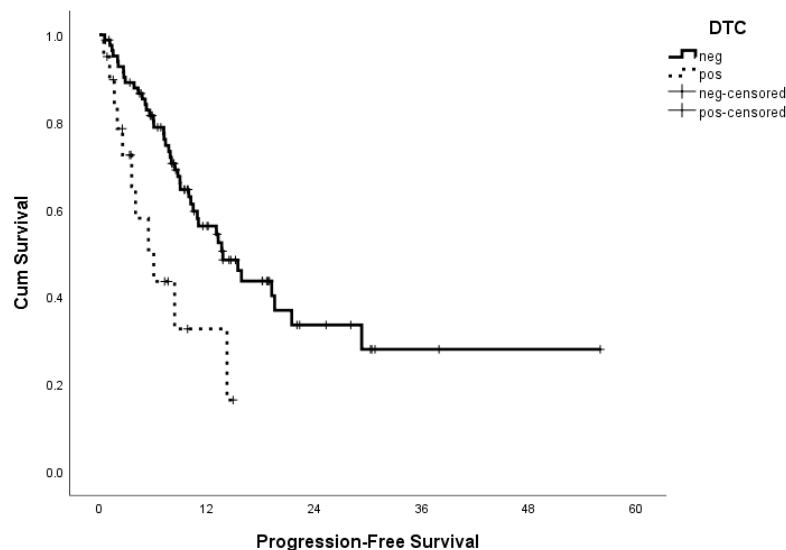

| Overall comparison    | Chi-Square | <i>p</i> |
|-----------------------|------------|----------|
| Log Rank (Mantel-Cox) | 8.267      | 0.004    |

Legend: *p*-value Indicates significance according to Log-Rank (Mantel-Cox).

**Figure S8.** Univariate Kaplan-Meier analysis for progression-free survival according to DTC detection.

## 2. Supplementary Tables

**Table S1.** Multivariate analysis of overall survival in patients with pancreatic cancer without stratification.

| Variables | Multivariate Analysis |        |          |
|-----------|-----------------------|--------|----------|
|           | HR                    | 95% CI | <i>p</i> |

|                                     |      |           |        |
|-------------------------------------|------|-----------|--------|
| Age,<br><65, ≥65                    | 1.96 | 1.09–3.52 | 0.024  |
| Sex,<br>male vs female              | 1.40 | 0.78–2.50 | 0.252  |
| Tumor size,<br>T1–4                 | 1.15 | 0.75–1.78 | 0.503  |
| Nodal status,<br>neg vs. pos        | 2.64 | 1.11–6.25 | 0.027  |
| UICC,<br>I–IV                       | 1.30 | 0.98–1.73 | 0.064  |
| HGC,<br>I–IV                        | 2.09 | 1.52–2.86 | <0.001 |
| Resection margin,<br>R0/R1 vs R2/Rx | 1.51 | 0.79–2.88 | 0.212  |

Legend: *p* Indicates significance according to cox regression analysis comparing the specified variables. HR indicates hazard ratio.

**Table S2.** Multivariate analysis of progression-free survival in patients with pancreatic cancer without stratification.

| Variables                           | Multivariate Analysis |           |          |
|-------------------------------------|-----------------------|-----------|----------|
|                                     | HR                    | 95% CI    | <i>p</i> |
| Age,<br><65, ≥65                    | 2.21                  | 1.20–4.09 | 0.011    |
| Sex,<br>male vs female              | 1.34                  | 0.75–2.40 | 0.320    |
| Tumor size,<br>T1–4                 | 1.27                  | 0.80–2.02 | 0.307    |
| Nodal status,<br>neg vs. pos        | 1.90                  | 0.86–4.18 | 0.109    |
| UICC,<br>I–IV                       | 1.13                  | 0.84–1.51 | 0.414    |
| HGC,<br>I–IV                        | 2.16                  | 1.56–3.00 | <0.001   |
| Resection margin,<br>R0/R1 vs R2/Rx | 2.01                  | 1.03–3.92 | 0.039    |

Legend: *p* Indicates significance according to cox regression analysis comparing the specified variables. HR indicates hazard ratio.

**Table S3.** Multivariate analysis of overall survival in patients with pancreatic cancer when taking chemotherapy into consideration (*n* = 51).

| Variables                    | Multivariate Analysis |           |          |
|------------------------------|-----------------------|-----------|----------|
|                              | HR                    | 95% CI    | <i>p</i> |
| Age,<br><65, ≥65             | 1.45                  | 0.42–4.94 | 0.548    |
| Sex,<br>male vs female       | 1.32                  | 0.42–4.18 | 0.627    |
| Tumor size,<br>T1–4          | 1.47                  | 0.82–3.74 | 0.147    |
| Nodal status,<br>neg vs. pos | 0.315                 | 0.06–1.54 | 0.154    |
| UICC,<br>I–IV                | 2.73                  | 1.48–5.06 | 0.001    |
| HGC,<br>I–IV                 |                       |           | 0.002    |

|                                     |      |            |        |
|-------------------------------------|------|------------|--------|
| IV vs I                             | 0.13 | 0.001–0.49 | ≤0.001 |
| IV vs II                            | 0.25 | 0.001–0.65 | ≤0.001 |
| IV vs III                           | 0.78 | 0.001–0.13 | ≤0.001 |
| Resection margin,<br>R0/R1 vs R2/Rx | 7.86 | 1.81–34.02 | 0.006  |
| Chemotherapy                        | 0.18 | 0.03–1.00  | 0.051  |

Legend: *p* Indicates significance according to cox regression analysis comparing the specified variables. HR indicates hazard ratio.

**Table S4.** Multivariate analysis of progression-free survival in patients with pancreatic cancer when taking chemotherapy into consideration.

| Variables                           | Multivariate Analysis |            |          |
|-------------------------------------|-----------------------|------------|----------|
|                                     | HR                    | 95% CI     | <i>p</i> |
| Age,<br><65, ≥65                    | 2.18                  | 0.72–6.53  | 0.164    |
| Sex,<br>male vs female              | 1.83                  | 0.65–5.12  | 0.245    |
| Tumor size,<br>T1–4                 | 1.54                  | 0.82–3.74  | 0.247    |
| Nodal status,<br>neg vs. pos        | 0.62                  | 0.15–2.48  | 0.506    |
| UICC,<br>I–IV                       | 1.52                  | 0.93–2.48  | 0.093    |
| HGC,<br>IV vs I                     | 0.13                  | 0.001–0.49 | ≤0.001   |
| IV vs II                            | 0.25                  | 0.001–0.65 | 0.002    |
| IV vs III                           | 0.78                  | 0.001–0.13 | 0.002    |
| Resection margin,<br>R0/R1 vs R2/Rx | 7.86                  | 1.81–34.02 | 0.011    |
| Chemotherapy                        | 0.50                  | 0.11–2.17  | 0.359    |

Legend: *p* Indicates significance according to cox regression analysis comparing the specified variables. HR indicates hazard ratio.
